# Supplementary material for: Downregulation of long noncoding RNA LINC01419 inhibits cell migration, invasion, and tumor growth and promotes autophagy via inactivation of the PI3K/Akt1/mTOR pathway in gastric cancer
Source: PubMed Central journal article supplement — Ther Adv Med Oncol. 2019 Sep 24;11:1758835919874651. doi: 10.1177/1758835919874651 (PMC6759708; doi:10.1177/1758835919874651), 2019-09-24

**A**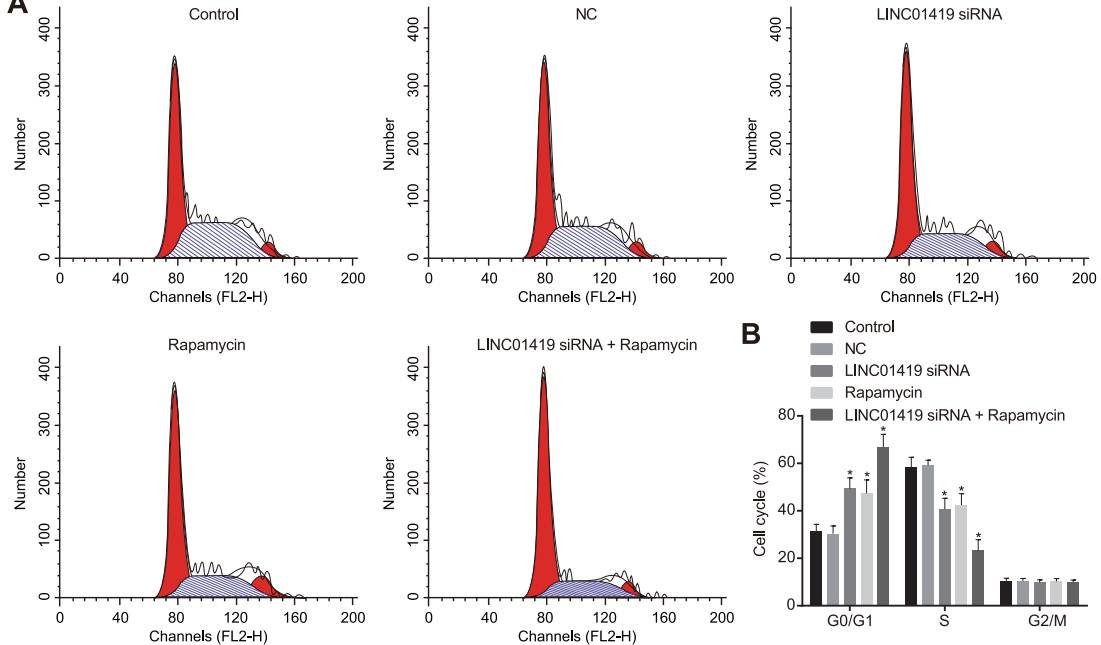

Supplement: TAM874651_supp_fig.pdf [file TAM874651_supp_fig.pdf]
